# Supplementary material for: CircRNA-1926 Promotes the Differentiation of Goat SHF Stem Cells into Hair Follicle Lineage by miR-148a/b-3p/CDK19 Axis
Source: PubMed Central journal article supplement (PMC7552268; doi:10.3390/ani10091552), 2020-09-02
Supplement: animals-10-01552-s001.pdf [file animals-10-01552-s001.pdf]

```

goat CDK8 (XP_005687614.1) MDYDFKVKLSSEERERVEDLFEYEGCKVGRGTYGHVYKAKRKDGKDDKDYALKQIEGTGIS 60
goat CDK19 (XP_017908559.1) ----- 1

goat CDK8 (XP_005687614.1) MSACREIALLLRELKHPNVISLQKVFLSHADRKVWLLFDYAEHDLWHIIKFRASKANKKP 120
goat CDK19 (XP_017908559.1) .....A.....S..... 60

goat CDK8 (XP_005687614.1) VQLPRGMVKSLLYQILDGIHYLHANWVLRDLK PANILVMGEGPERGRVKIADMGFARLF 180
goat CDK19 (XP_017908559.1) M....S..... 120

goat CDK8 (XP_005687614.1) NSPLKPLADLDPVVVTFWYRAPELLLGARHYTKAIDIWAIGCIFAELLTSEPIFHCQRQED 240
goat CDK19 (XP_017908559.1) ..... 180

goat CDK8 (XP_005687614.1) IKTSNPYHHDQLDRIFNVMGFPADKDWEDIKKMPEHSTLMKDFRNTYTNCSLIKYMEKH 300
goat CDK19 (XP_017908559.1) .....F.....S.....R....YP..Q.....T..A.S..... 240

goat CDK8 (XP_005687614.1) KVKPDSKAFHLLQKLLTMDPIKRITSEQAMQDPYFLEDPLPTSDVFAGCQIPYPKREFLT 360
goat CDK19 (XP_017908559.1) .....V.L.....T.....L.....Q.....L.....N 300

goat CDK8 (XP_005687614.1) EEEPDDKGDKNQQQQ-----PGNNHTNGTG----HPG--- 389
goat CDK19 (XP_017908559.1) .D..EE...NQ...NQHQPTAPPQQAAPPQAPPQQNSTQ...AGGAGAG.AGAG 360

goat CDK8 (XP_005687614.1) ---NQDSSHTQGPPLKVRVVPPTTSSGGLIMITSDYQRSNPHAAYPNPGPSTSQPQSSMG 446
goat CDK19 (XP_017908559.1) LQHS...GLN.V..N..P.LG.SG.N...PV.P....H.SSRLN.QSSVQGS..S..TL. 420

goat CDK8 (XP_005687614.1) YSTTSQPPQY--SHQTHRY 464
goat CDK19 (XP_017908559.1) ..SS...SA..HP...A... 440

```

**Figure S1.** A protein sequence alignment between CDK8 and CDK19 in goat.

**Table S1.** Details of the primers in this study and their corresponding amplicon size.

| Genes                     | Reference                 | Primer pair with sequence (5'-3') <sup>a</sup>           | Primer length (nt) | TA <sup>b</sup> (°C) | Amplicon size <sup>c</sup> (bp) |
|---------------------------|---------------------------|----------------------------------------------------------|--------------------|----------------------|---------------------------------|
| circRNA-1926              | [16]                      | F: GGTGGCATCGATAATCCTGC<br>R: ACAGATCCCACATTTCAGAACT     | 20<br>22           | 55                   | 182                             |
| <i>Keratin 6</i>          | XM_018049019.1 in GenBank | F: CAGTCGCAGCCTCTACAACCT<br>R: CAAATGCCACCTCCATAACCA     | 21<br>21           | 56                   | 159                             |
| <i>Keratin 7</i>          | XM_005680100.3 in GenBank | F: GAGTTTGTGGTGTGAAGAA<br>R: AAGTCCAGGGAGCGGTTGTT        | 20<br>20           | 56                   | 194                             |
| <i>Keratin 8</i>          | XM_005679931.3 in GenBank | F: TCCTTCAGCAGCCGCTCCTA<br>R: CTGTAATGCCCCCAAACCT        | 20<br>20           | 58                   | 160                             |
| <i>Keratin 16</i>         | XM_013972083.2 in GenBank | F: CCTTTGTGGCTAGTGGTATG<br>R: CAGTTTCAGGGGTTGCTTAT       | 20<br>20           | 55                   | 188                             |
| <i>Keratin 17</i>         | XM_018065055.1 in GenBank | F: GGGGAATGAAACAGAGGAG<br>R: GAGGAGAGAAGCCCAAGATG        | 20<br>20           | 56                   | 112                             |
| <i>CDK19</i>              | XM_005684572.3 in GenBank | F: TGAGAGGGGGAGAGTCAAAATA<br>R: ACCAGAAAGTCACAACACTACAGG | 22<br>22           | 55                   | 104                             |
| <i>UBC</i>                | [23]                      | F:GCATTGTTGGGTTCTGTGT<br>R:TTTGCAATTTGACCTGTGAG          | 20<br>20           | 52                   | 90                              |
| <i>YWHAZ</i>              | [23]                      | F:TGTAGGAGCCCGTAGGTCATCT<br>R:TTCTCTGTATTCTCGAGCCATCT    | 22<br>25           | 56                   | 102                             |
| <i>SDHA</i>               | [23]                      | F:AGCACTGGAGGAAGCACAC<br>R:CACAGTCGGTCTCGTTCAA           | 19<br>19           | 53                   | 105                             |
| <i>CDK19</i> <sup>d</sup> | The present study         | F:TTGAATGTTTAGTTTTTAAAT<br>R:ACAACCTCCATACTAACATAAA      | 22<br>22           | 55                   | 544                             |
| miR-152-3p                | MIMAT0000162 in miRBase   | F:CGTCAGTGCATGACAGAACTTGG                                | 23                 | 62                   | N.A.                            |
| miR-148a-3p               | MIMAT0035977 in miRBase   | F:CGTCAGTGCACACTACAGAACTTTGT                             | 24                 | 60                   | N.A.                            |
| miR-148b-3p               | MIMAT0035979 in miRBase   | F:CGTCAGTGCATCACAGAACTTTGT                               | 24                 | 62                   | N.A.                            |
| miR-642a-5p               | MIMAT0003312 in miRBase   | F:CGGTCCCTCTCCAAATGTGTCTTG                               | 24                 | 63                   | N.A.                            |
| let-7d-5p                 | [24]                      | F:CGAGAGGTAGTAGGTTGCATAGTT                               | 24                 | 62                   | N.A.                            |
| miR-26a-5p                | [24]                      | F:CGTTCAAGTAATCCAGGATAGGCT                               | 24                 | 61                   | N.A.                            |
| miR-15a-5p                | [24]                      | F: CGTAGCAGCACATAATGGTTTGTG                              | 24                 | 63                   | N.A.                            |

<sup>a</sup> F: forward, R:reverse; <sup>b</sup> TA annealing temperature; <sup>c</sup> N.A.: not available; <sup>d</sup> CDK19 was used for the designing of BSP primers.
